# Supplementary material for: Jaccard/Tanimoto similarity test and estimation methods for biological presence-absence data
Source: PubMed Central journal article supplement (PMC6929325; doi:10.1186/s12859-019-3118-5), 2019-12-24

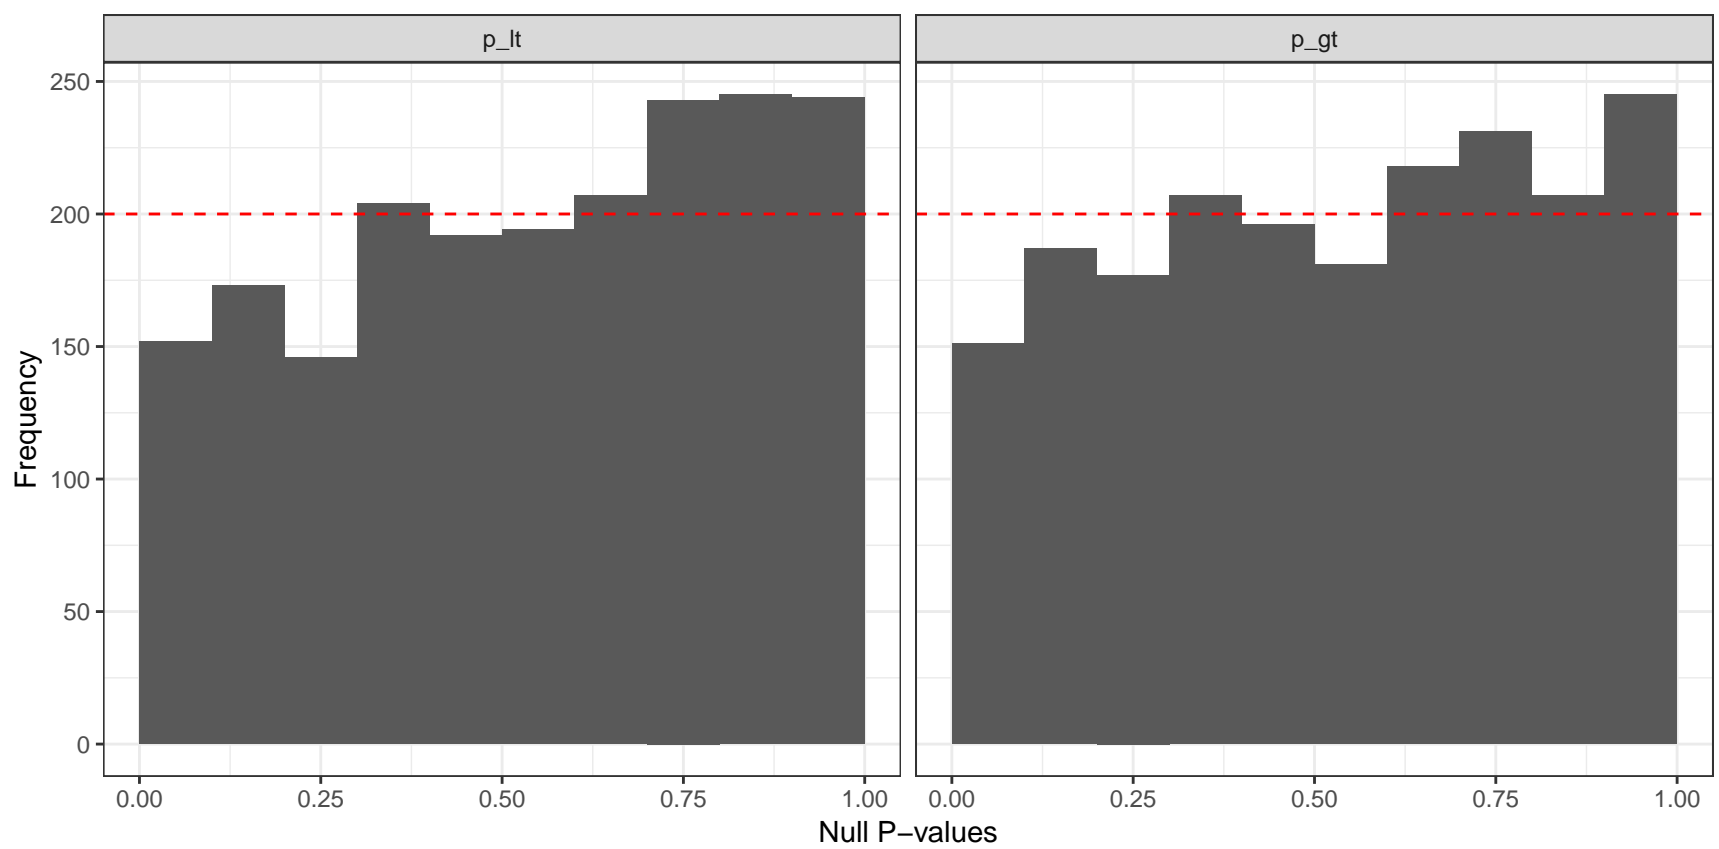

Supplement: 12859_2019_3118_MOESM3_ESM.pdf [file 12859_2019_3118_MOESM3_ESM.pdf]
